# Supplementary material
Source: Springer Nature journal article supplement (https://www.springermedizin.de/resource/supplementary/12995_2013_287_MOESM3_ESM.pdf/9623068)

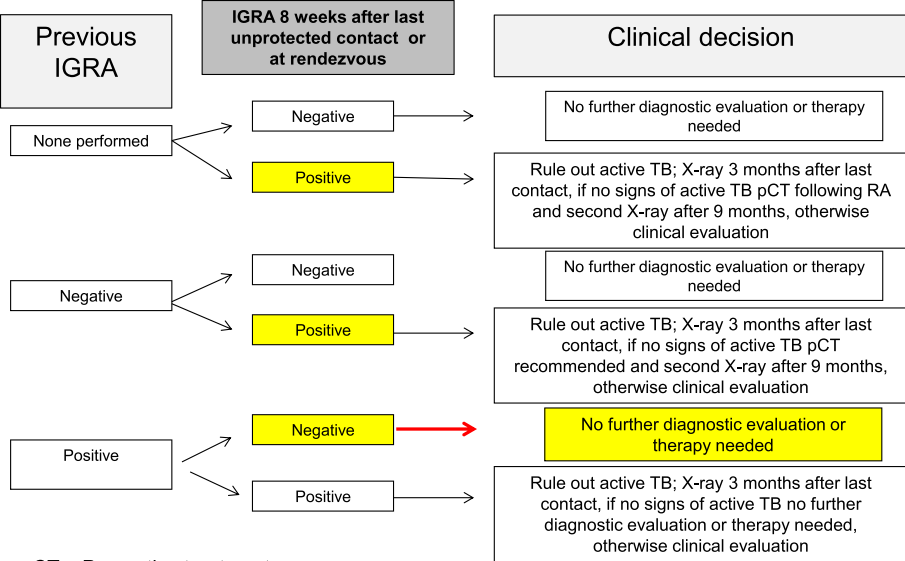

pCT = Preventive treatment  
 RA = Risk assessment

Supplement: MOESM3 [file 9623068]
